# Supplementary material
Source: publisher site journal article supplement (https://www.dovepress.com/article/543601)
Supplement: Supplementary file 1 [file 543601%20Revised%20Supplementary%20Table%201.docx]

Supplementary Table 1 Sequences and Primers involved in the study

|  | Sequences and Primers |
| --- | --- |
| miR-6844 | Forward 5'-AGCGCACAGACACAAC-3' |
| Reversed 5'-AATGTGGCACAGAACA-3' |
| MTAP | Forward 5'-AGGGACCTCGTTTTAGCTC-3' |
| Reversed 5'-GAAACTGCTTCCTCGTGCT-3' |
| U6 | Forward 5'-CTCGCTTCGGCAGCACA-3' |
| Reversed 5'-CGCTTCACGAAATTTGC-3' |
| miR-6844 mimic | 5'-UUCUUUGUUUUUAAUUCACAG-3' |
| 5'-AAGAAAACAAAAAUUAAGUGUC-3' |
| miR-6844 inhibitor | 5'-CUGUGAAUUAAAAACAAAAGAA-3' |
| mimic NC | 5’-UUCUCCGAACGUGUCACGU-3’ |
| inhibitor NC | 5’-CAGUACUUUUGUGUAGUACAA-3’ |
| si-MTAP | 5'-GGAAUUUACUGCAGACUAU-3' |
| 5'-AUAGUCUGCAGUAAAUUCC-3' |
| si-NC | 5'-UUCUCCGAACGUGUCACGU-3' |
| 5'-UUCUCCGAACGUGUCACGU-3' |
